# Supplementary material for: A combination of proton spin diffusion NMR and molecular simulations to probe supramolecular assemblies of organic molecules in nanoporous materials
Source: Royal Society of Chemistry journal article supplement (doi:10.1039/d2dt00497f), 2022-01-01
Supplement: d2dt00497f1.pdf [file d2dt00497f1.pdf]

## ---Supporting Information---

### **A combination of Proton Spin Diffusion NMR and molecular simulations to probe supramolecular assemblies of organic molecules in nanoporous materials**

*Eddy Dib,<sup>a\*</sup> Beatriz Bernardo-Maestro,<sup>b</sup> Fernando López-Arbeloa,<sup>c</sup> Joaquín Pérez-Pariante,<sup>b</sup> and Luis Gómez-Hortigüela<sup>b\*</sup>*

<sup>a</sup> Normandie Univ, ENSICAEN, UNICAEN, CNRS, Laboratoire Catalyse et Spectrochimie, 14000 Caen, France

<sup>b</sup> Instituto de Catálisis y Petroleoquímica-CSIC, C/Marie Curie 2, 28049, Cantoblanco, Madrid, Spain

<sup>c</sup> Departamento de Química Física, Universidad del País Vasco, Apartado 644, 48080, Bilbao, Spain

E-mail : [eddy.dib@ensicaen.fr](mailto:eddy.dib@ensicaen.fr), [lhortiguela@icp.csic.es](mailto:lhortiguela@icp.csic.es)

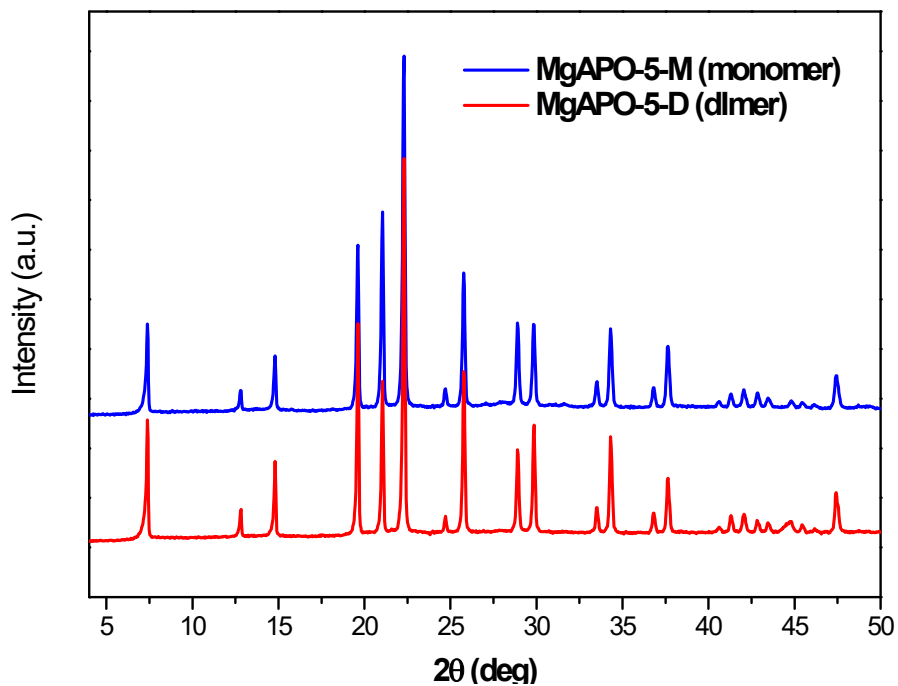

**Figure S1.** XRD patterns of MgAPO-5-M (with EPH monomers) and MgAPO-5-D (with EPH dimers) samples.

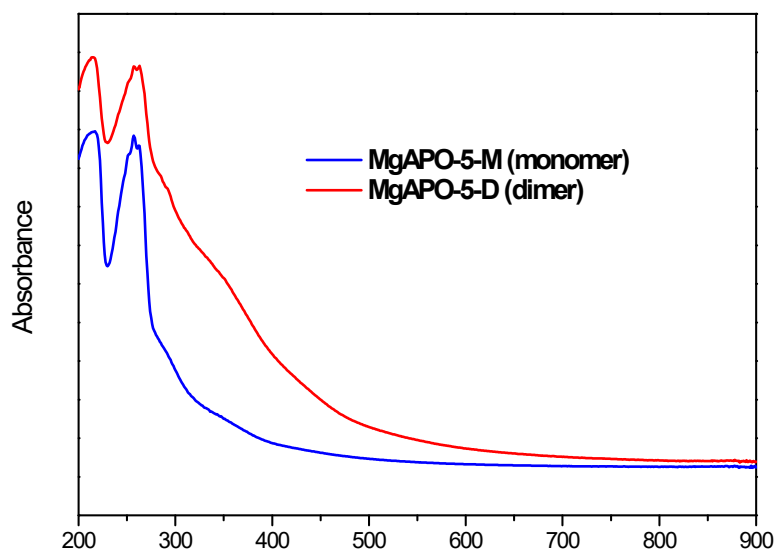

**Figure S2.** Diffuse Reflectance UV-Vis spectra of MgAPO-5-M (a) and MgAPO-5-D (b).

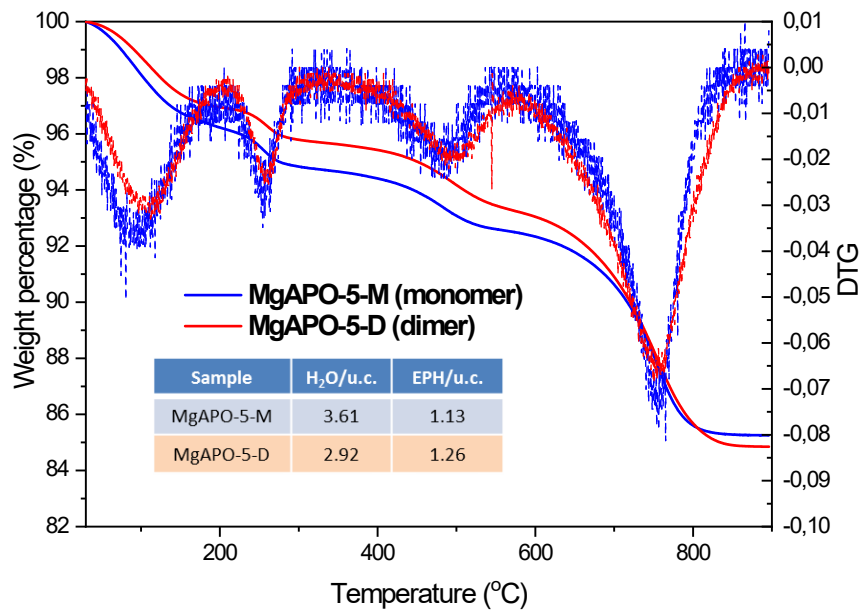

**Figure S3.** TGA of MgAPO-5-M (blue line) and MgAPO-5-D (red line), and their corresponding water and EPH contents per unit cell.

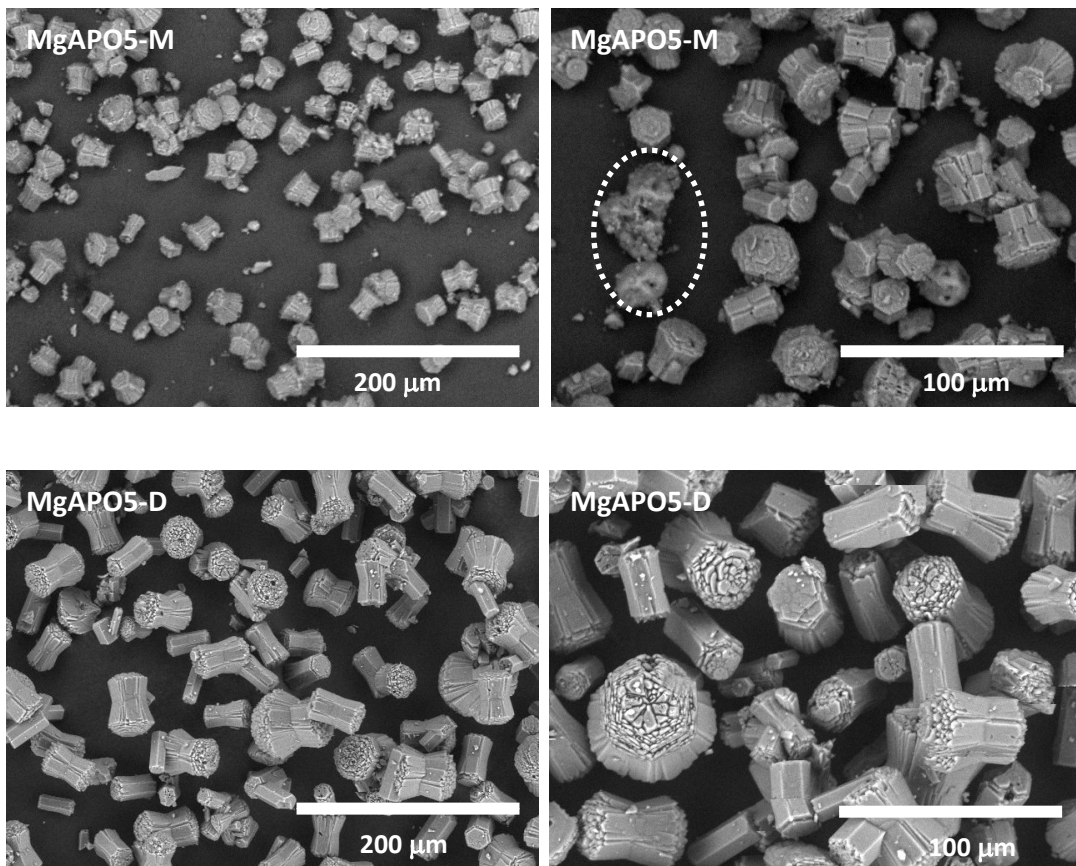

**Figure S4.** SEM pictures of MgAPO5-M (with monomers, top) and MgAPO5-D (with dimers, bottom) samples, with x500 (left) and x1000 (right) magnifications. Dashed circle shows the presence of some amorphous material.

Solid State MAS-NMR spectra of the solid samples were recorded with a Bruker AV 400 WB spectrometer, using a BL7 probe for  $^{13}\text{C}$  and a BL4 probe for  $^{31}\text{P}$  and  $^{27}\text{Al}$ .  $^1\text{H}$  to  $^{13}\text{C}$  Cross-Polarization spectra were recorded using  $\pi/2$  rad pulses of  $2.75\ \mu\text{s}$  for  $^1\text{H}$ , a contact time of 3 ms and a recycle delay of 4 s. For  $^{31}\text{P}$ ,  $\pi/2$  rad pulses of  $4.25\ \mu\text{s}$  and recycle delays of 80 s were used. For  $^{27}\text{Al}$ ,  $\pi/12$  rad pulses of  $1\ \mu\text{s}$  and recycle delays of 1 s were used. All these spectra were recorded while spinning the samples at *ca.* 11.2 kHz.

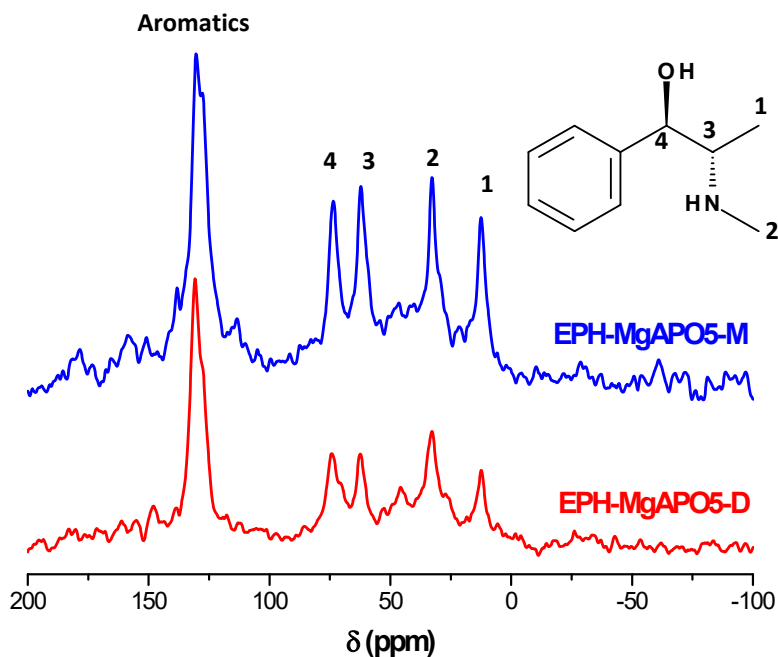

**Figure S5.**  $^{13}\text{C}$  NMR spectra of MgAPO-5-M (top, blue line) and MgAPO-5-D (bottom, red line).

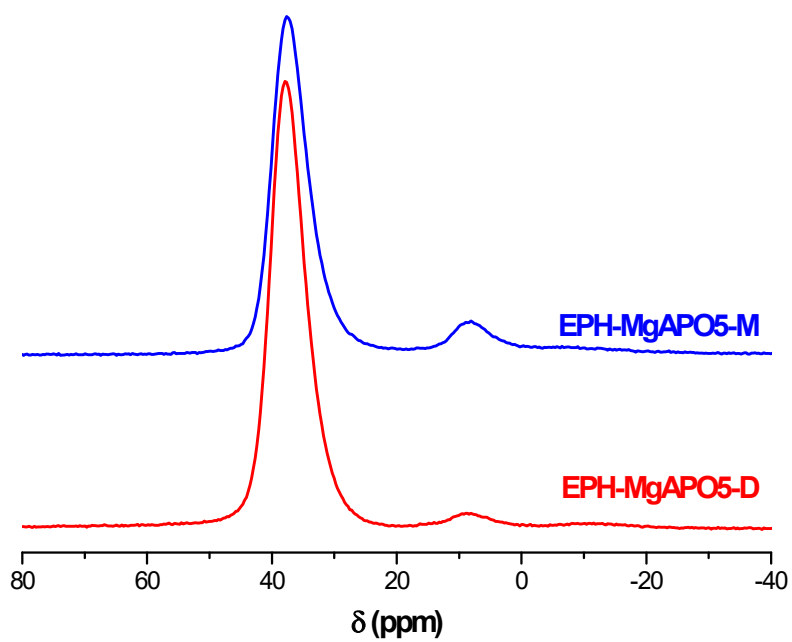

**Figure S6.**  $^{27}\text{Al}$  NMR spectra of MgAPO-5-M (top, blue line) and MgAPO-5-D (bottom, red line).

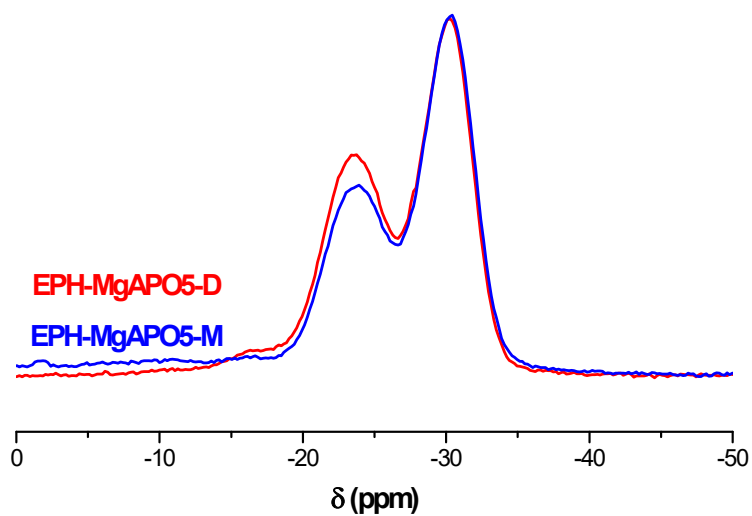

**Figure S7.**  $^{31}\text{P}$  NMR spectra of MgAPO-5-M (top, blue line) and MgAPO-5-D (bottom, red line).

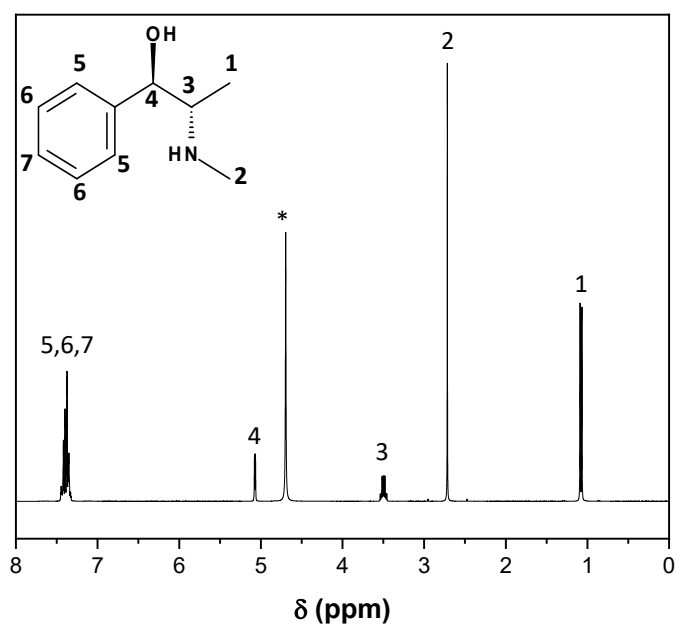

**Figure S8.** Liquid <sup>1</sup>H NMR spectra of ephedrine hydrochloride in D<sub>2</sub>O; \* indicates band assigned to water.

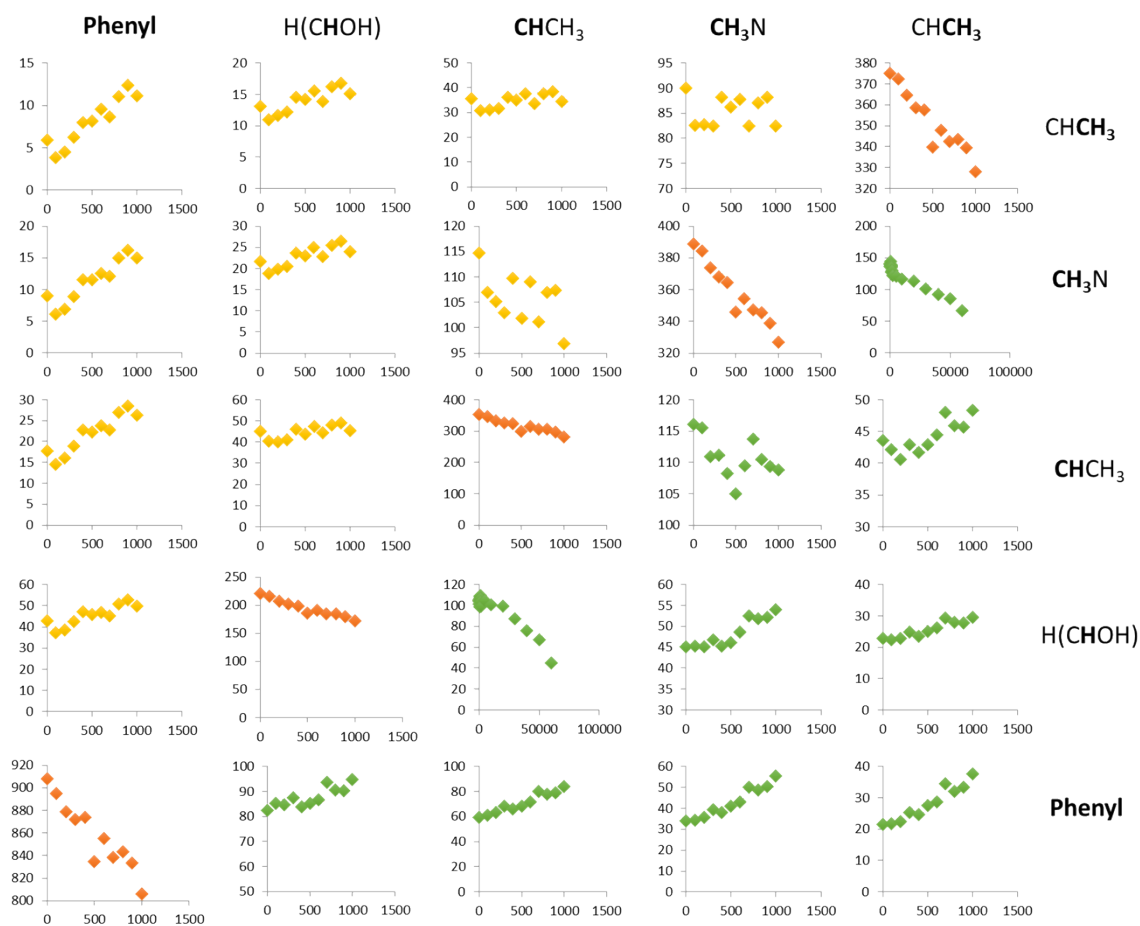

**Figure S9.** Measured peak intensities as a function of spin diffusion mixing time varying from 0 to 1000 microseconds for the 25 peaks observed in the 2D spin diffusion experiment for MgAPO-5-M.
